# Supplementary material for: Homeostatic control of START through negative feedback between Cln3-Cdk1 and Rim15/Greatwall kinase in budding yeast
Source: eLife journal article supplement (doi:10.7554/elife.26233), 2017-06-10
Supplement: supp [file elife-26233-supp-v1.zip]

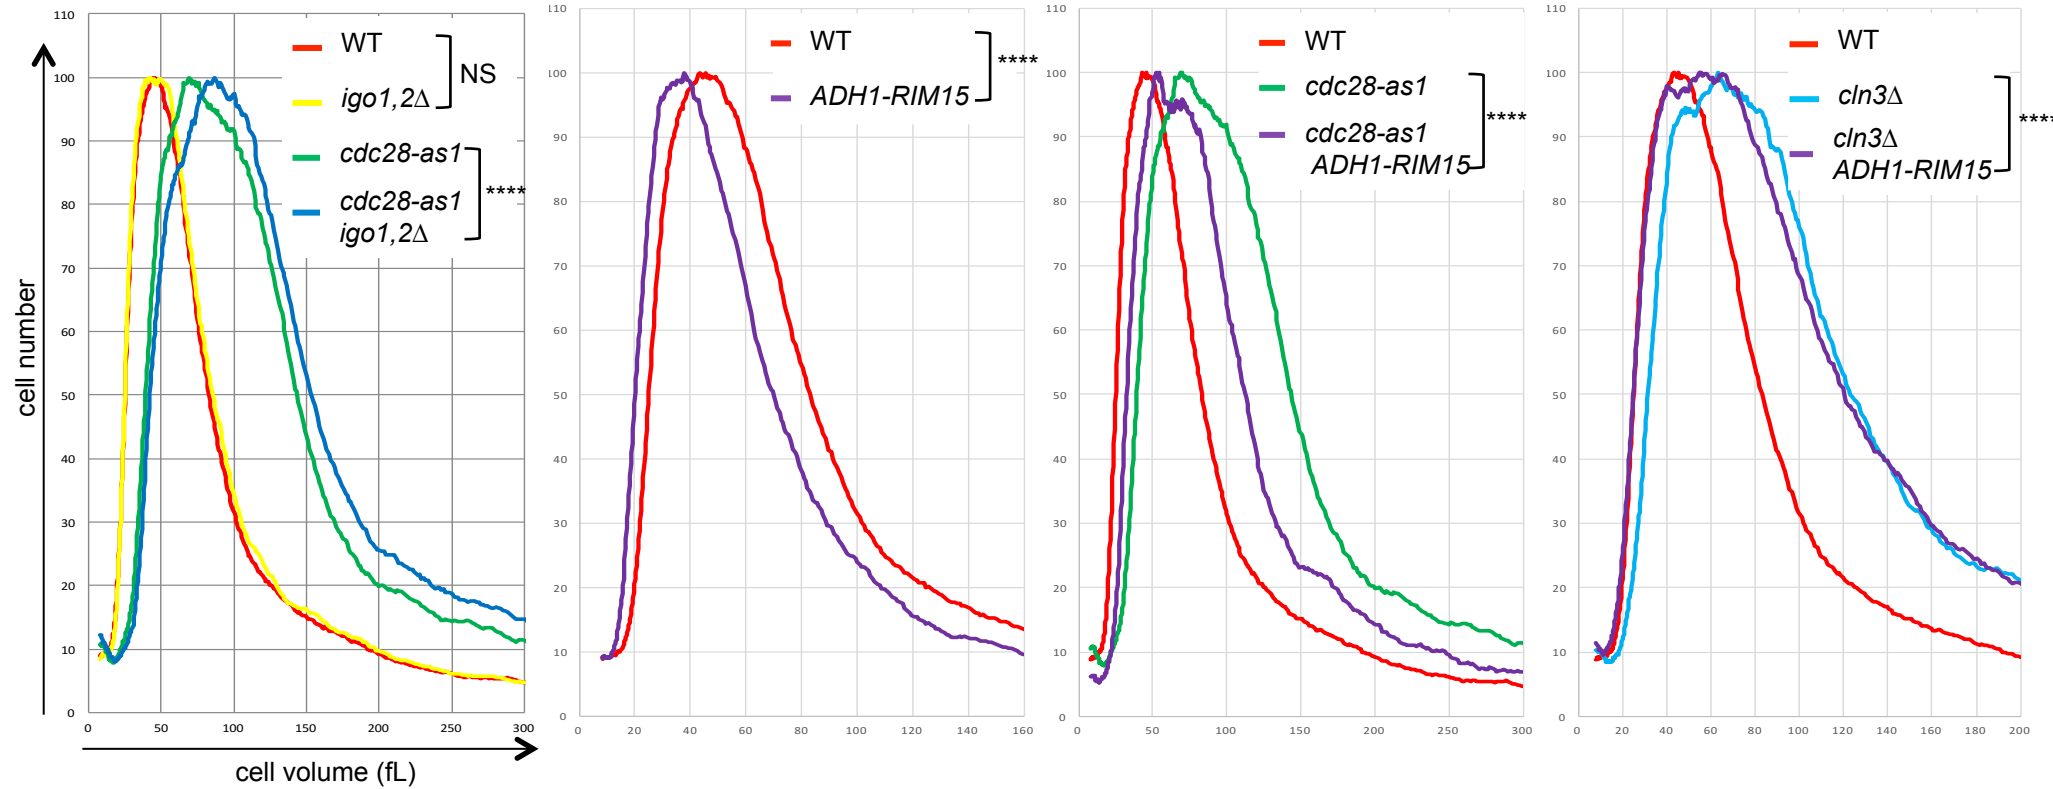

**Figure 1 – Supplement 2:** The Rim15-Igo1,2 pathway controls cell size. Cell size distribution of asynchronous populations of cells growing in SC-D medium at 30°C was analysed on a CASY 1-TTC cell analyser (>10,000 cells analysed/sample). Pairwise comparisons indicate that wild-type and *igo1,2Δ* populations are not significantly different (NS), whereas all other comparisons show differences in cell size distributions (Chi2 test,  $p < 0.0001$ ; \*\*\*\*), with *igo1,2Δ* ablation causing size increase in *cdc28-as1* cells (left panel) and *RIM15* overexpression causing cell size reduction in WT, *cdc28-as1* and *cln3Δ* cells. Strains: wild-type (E3087), *igo1,2Δ* (E4255), *cdc28-as1* (E4479), *cdc28-as1 igo1,2Δ* (E4458), *ADH1-RIM15* (E5504), *cdc28-as1 ADH1-RIM15* (E5323), *cln3Δ* (E5493) and *cln3Δ ADH1-RIM15* (E5505).
