# Supplementary material for: Homeostatic control of START through negative feedback between Cln3-Cdk1 and Rim15/Greatwall kinase in budding yeast
Source: eLife journal article supplement (doi:10.7554/elife.26233), 2017-06-10
Supplement: supp [file elife-26233-supp-v1.zip]

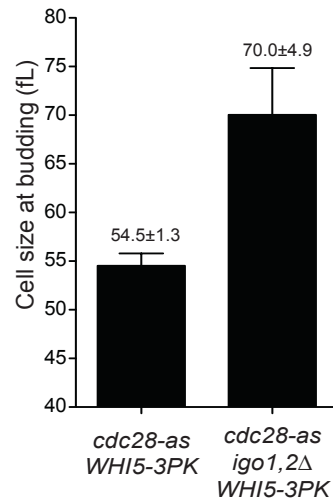

Figure 4-Supplement 1

**Figure 4-Supplement 1:** Cell size at budding after elutriation of *cdc28-as1 WHI5-3PK* (E5443) and *cdc28-as1 igo1,2Δ WHI5-3PK* (E5441) cells grown in SC-D. Mean  $\pm$ SD of four experiments (corresponding to Figure 4A).
