# Supplementary material for: Homeostatic control of START through negative feedback between Cln3-Cdk1 and Rim15/Greatwall kinase in budding yeast
Source: eLife journal article supplement (doi:10.7554/elife.26233), 2017-06-10
Supplement: supp [file elife-26233-supp-v1.zip]

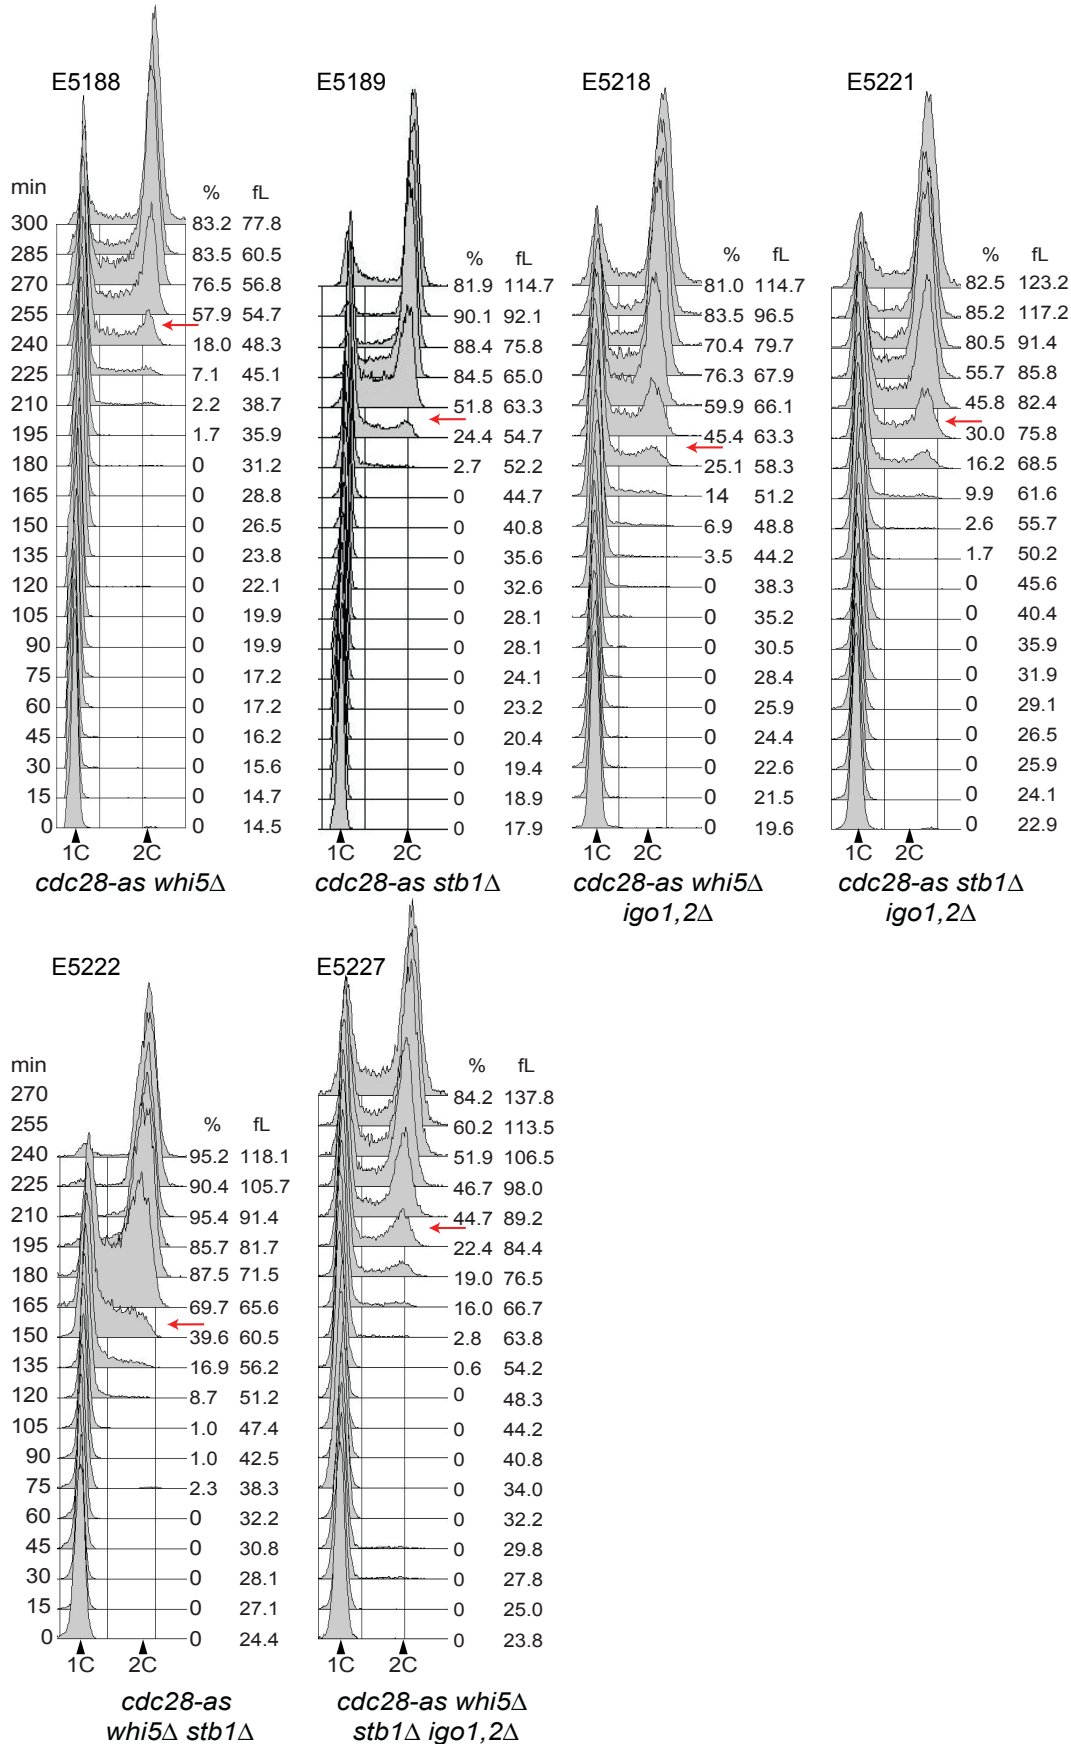

**Figure 4-Supplement 2:** Cell cycle progression determined by FACS analysis of DNA content of elutriated early cells of the indicated genotype released in SC-D at 30°C. The peak cell size (in fL) and the budding index are given for each time point. BI, Budding index. The red arrow indicates when half of cells have budded. Elutriations were done three to six times independently for each strain; one example is shown (corresponding to figure 4C).
