# Supplementary material for: Homeostatic control of START through negative feedback between Cln3-Cdk1 and Rim15/Greatwall kinase in budding yeast
Source: eLife journal article supplement (doi:10.7554/elife.26233), 2017-06-10
Supplement: supp [file elife-26233-supp-v1.zip]

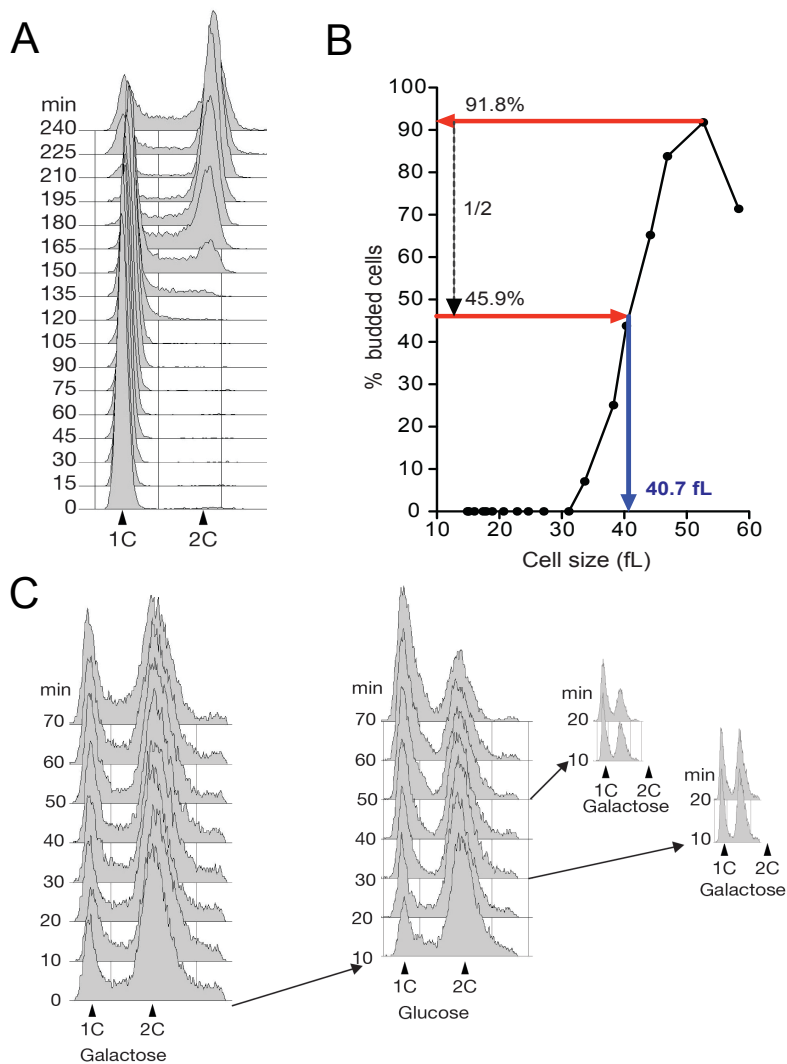

Figure 2-Supplement 1

**Figure 2-Supplement 1:** A) Cell cycle progression determined by FACS analysis of DNA content of elutriated early *IGO1-myc* cells (E4996) released in SC-D at 30°C (corresponding to figure 2A). B) Calculation of cell size at half-maximal budding. Median cell volume and budding index are measured at each time point during a synchronous cell cycle after elutriation. Normalized cell size at budding is calculated as the median cell size when the population reaches half-maximum budding. C) FACS profiles of experiment shown in Figure 2B.
