# Supplementary material for: Homeostatic control of START through negative feedback between Cln3-Cdk1 and Rim15/Greatwall kinase in budding yeast
Source: eLife journal article supplement (doi:10.7554/elife.26233), 2017-06-10
Supplement: supp [file elife-26233-supp-v1.zip]

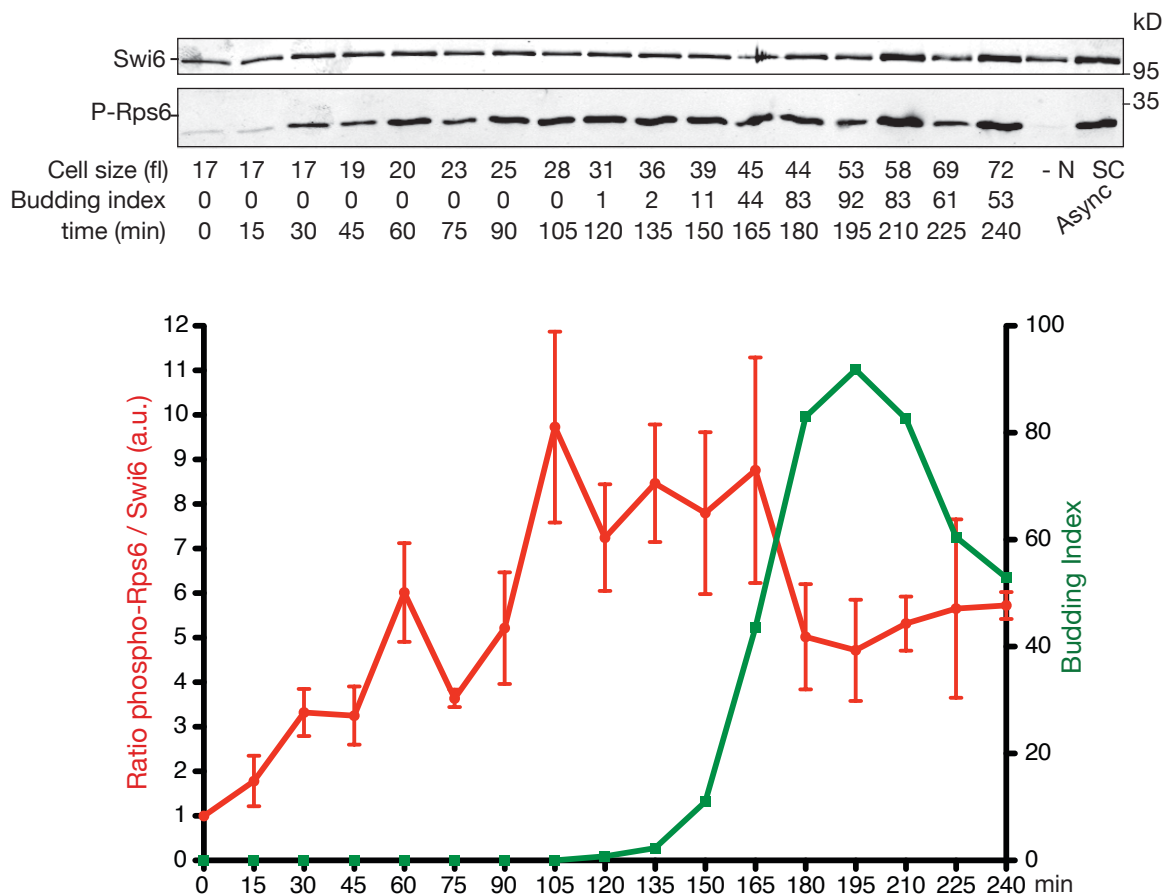

**Figure 2–Supplement 2:** TORC1 activity increases during G1 and drops in mitosis. Rps6 phosphorylation, a proxy for TORC1 activity, was quantitated throughout the cell cycle of WT cells (E3087) synchronized by centrifugal elutriation. Top panel: western blot of Swi6 (loading control) and phospho-Rps6 (P-Rps6). The two rightmost lanes are asynchronous cells grown in SC-D medium (SC) or starved for nitrogen (-N) for 1h (YNB w/o NH<sub>4</sub>SO<sub>4</sub>, 2% D). Bottom panel: quantification of P-Rps6 relative to Swi6 (red) showing mean and SD of three technical duplicates. The Rps6 phosphorylation profile and its transient dip in mid G1 (75 min, 23 fL) was confirmed in a biological duplicate. Budding index (green).
