# Supplementary material for: Homeostatic control of START through negative feedback between Cln3-Cdk1 and Rim15/Greatwall kinase in budding yeast
Source: eLife journal article supplement (doi:10.7554/elife.26233), 2017-06-10
Supplement: supp [file elife-26233-supp-v1.zip]

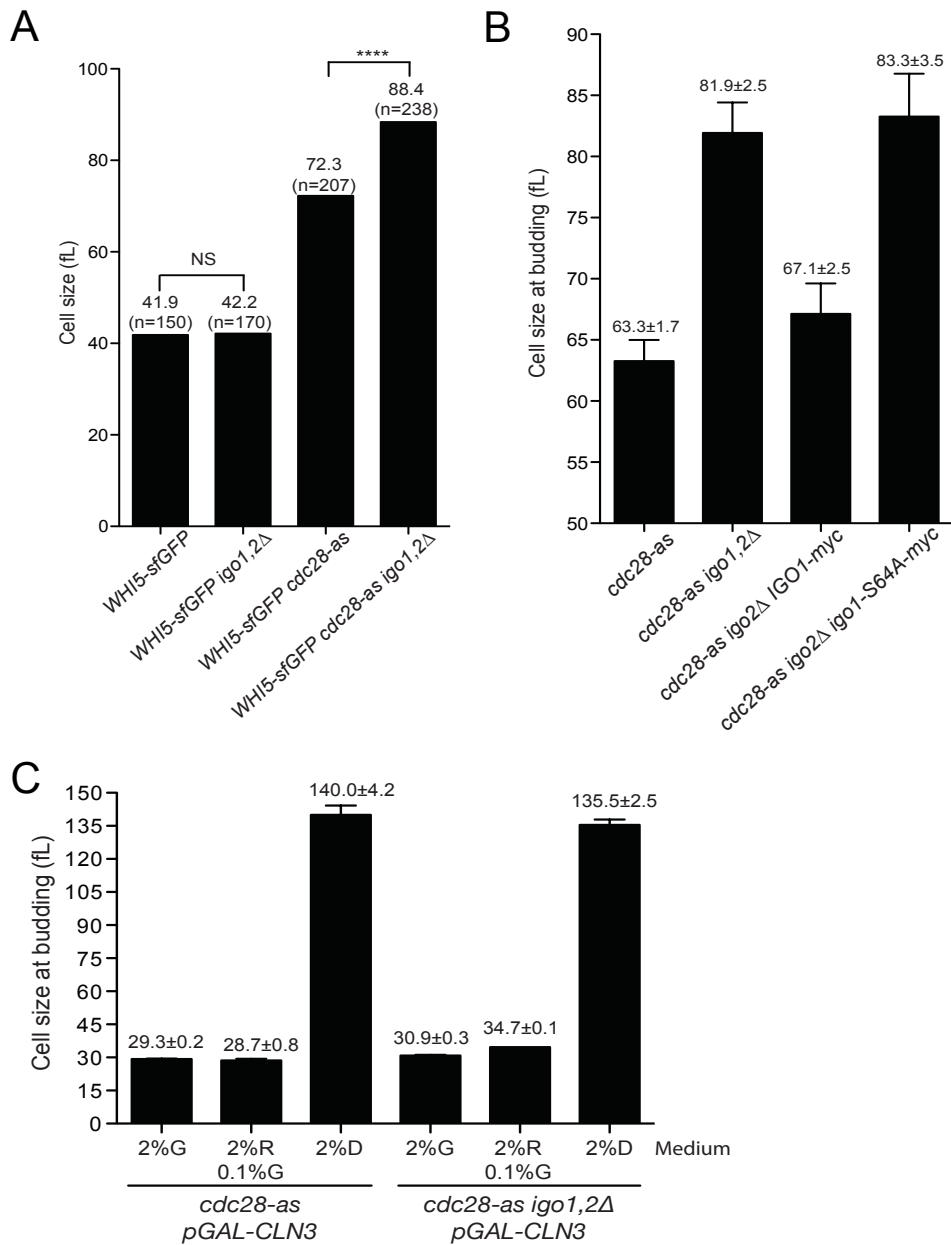

Figure 3-Supplement 1

**Figure 3-Supplement 1:** A) Single cell measurements of cell size in G1. Median cell volume of Whi5-positive unbudded cells in asynchronously growing cells of the indicated genotype (E5100, E4948, E5101, E5102), determined with BudJ software. N indicates the number of cells measured in each strain. Mann-Whitney test was used to determine if medians are different (NS, non-significant). B) Increased cell size at budding in *cdc28-as1 igo1,2Δ* cells is due to Rim15. Median cell size at budding after elutriation of the indicated strains (E4479, E4458, E4996, E4995) released in SC-D at 30°C. Mean ±SD of two independent experiments. C) Cell size at budding of *cdc28-as1* and *cdc28-as1 igo1,2Δ* depends on *CLN3*. Size at budding after elutriation was measured for *cdc28-as1* (E4479), *cdc28-as1 igo1,2Δ* (E4458), *cdc28-as1 GAL-CLN3* (E5373) and *cdc28-as1 igo1,2Δ GAL-CLN3* (E5231) grown SC-D, SC-Gal or SC-Raf+0.1%Gal. Mean ±SD of two independent experiments.
