# Supplementary material for: Homeostatic control of START through negative feedback between Cln3-Cdk1 and Rim15/Greatwall kinase in budding yeast
Source: eLife journal article supplement (doi:10.7554/elife.26233), 2017-06-10
Supplement: supp [file elife-26233-supp-v1.zip]

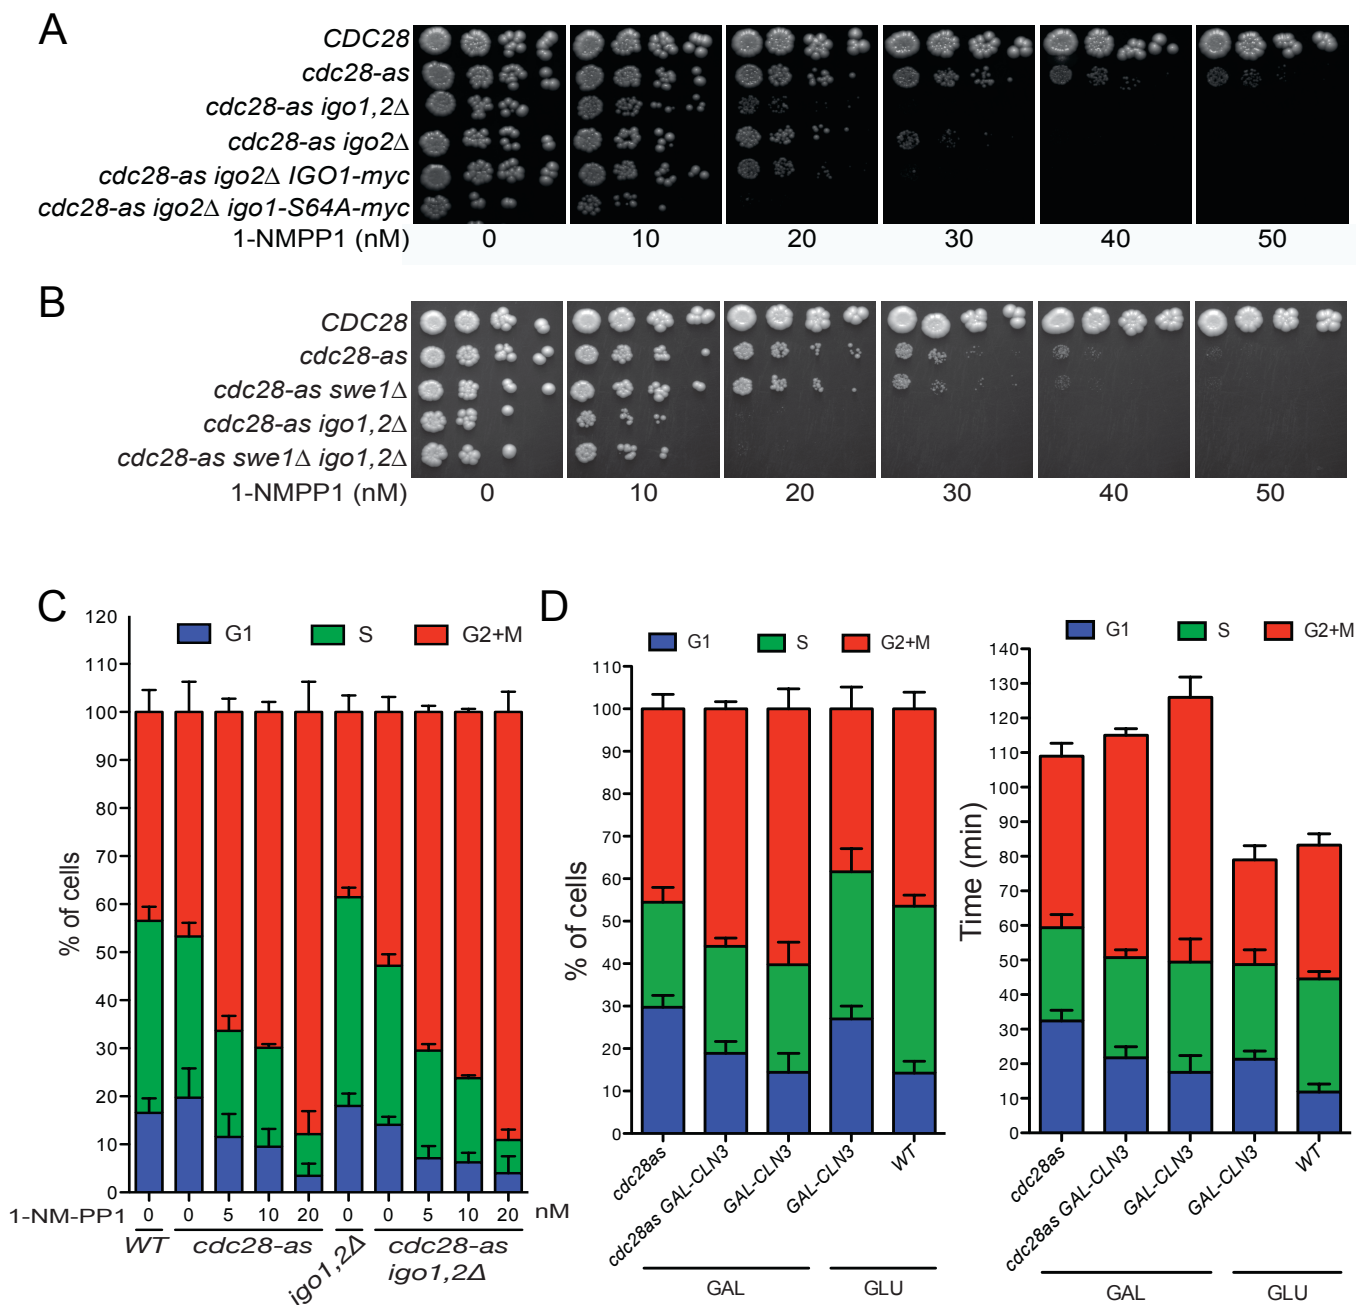

Figure 1-Supplement 1

**Figure 1-Supplement 1:** A) Non-phosphorylatable *igo1-S64A* phenocopies an *igo1Δ* deletion for hypersensitivity to 1-NMPP1. Cells of the indicated genotype (E3087, E4479, E4458, E4331, E4496, E4495) were spotted in 5-fold serial dilution on YPD plates containing increasing concentrations of 1-NMPP1. B) Hypersensitivity of *cdc28-as igo1,2Δ* cells to 1-NMPP1 is independent of *SWE1*. Strains E3087, E4479, E4452, E4458, E5169. C) Cell cycle distribution determined by EdU-PI bivariate FACS analysis of WT (E3087), *cdc28-as1* (E4479) *igo1,2Δ* (E4259) and *cdc28-as1 igo1,2Δ* (E4458) cells grown in SC-D containing the indicated concentrations of 1-NMPP1. D) Cell cycle distribution (left) and cycle phase duration (right) of WT (E3087), *cdc28-as1* (E4479), *GAL-CLN3* (E5493) and *cdc28-as1 GAL-CLN3* (E5492) cells grown at 30°C in SC-D or SC-Gal.
